# Supplementary material
Source: PubMed Central journal article supplement (PMC4824192)

# Metabolomics of cerebrospinal fluid from humans treated for rabies. Supplementary Material

*Aifric O'Sullivan<sup>1,†</sup>, Rodney E. Willoughby<sup>3</sup>, Darya Mishchuk<sup>1</sup>, Brisa Alcarraz<sup>4</sup>, Cesar Cabezas-Sanchez<sup>5</sup>, Rene Edgar Condori<sup>5</sup>, Dan David<sup>6</sup>, Rafael Encarnacion<sup>7</sup>, Naaz Fattah<sup>8</sup>, Josefina Fernandez<sup>7</sup>, Richard Franka<sup>9</sup>, Sara Hedderwick<sup>10</sup>, Conall McCaughey<sup>10</sup>, Joanne Ondrush<sup>8</sup>, Andres Paez-Martinez<sup>11</sup>, Charles Rupprecht<sup>9</sup>, Andres Velasco-Villa<sup>9</sup>, and Carolyn M. Slupsky<sup>1,2,\*</sup>*

**Figure S1.** Comparison of all measured metabolites in early stage rabies, mid / survivor stage rabies, and late stage (non-survivor) rabies.



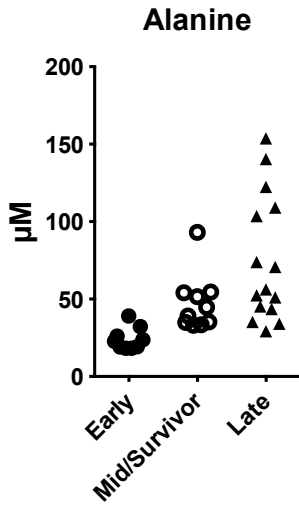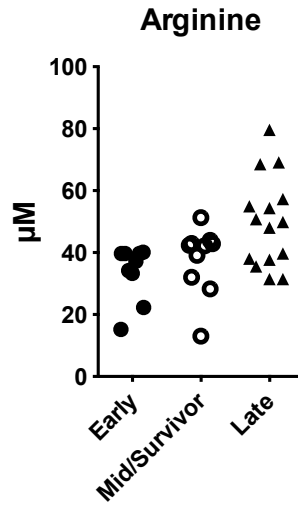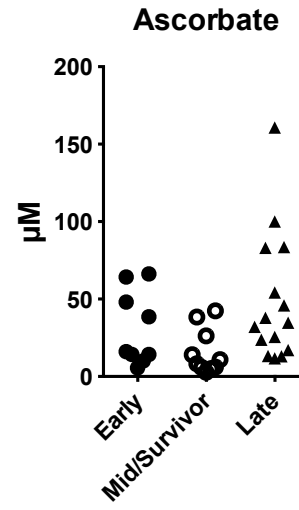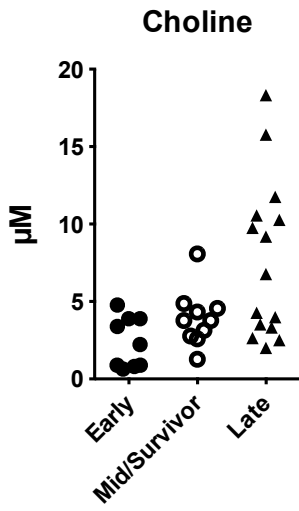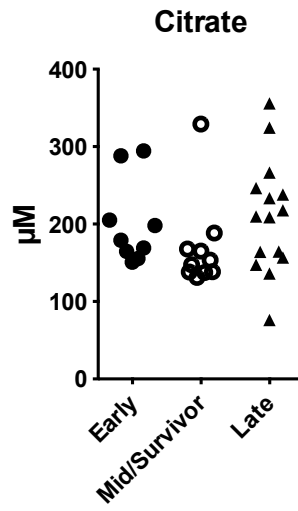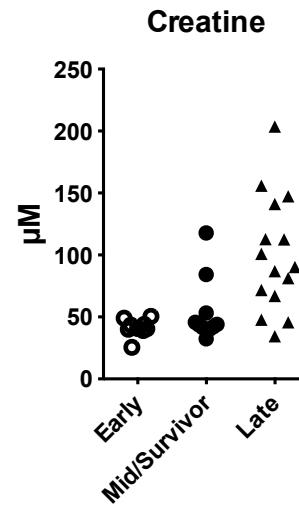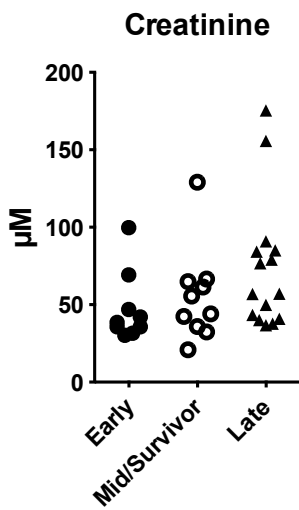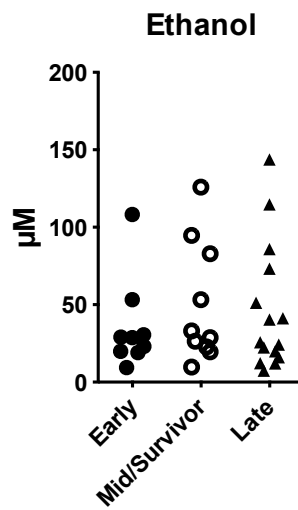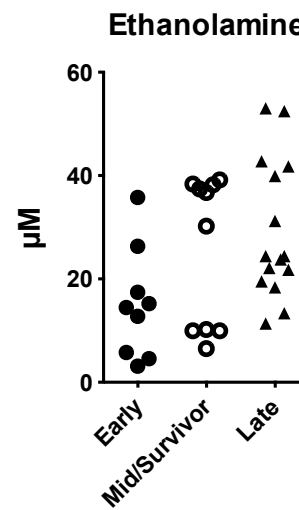

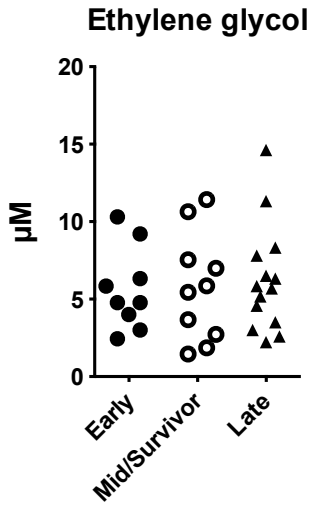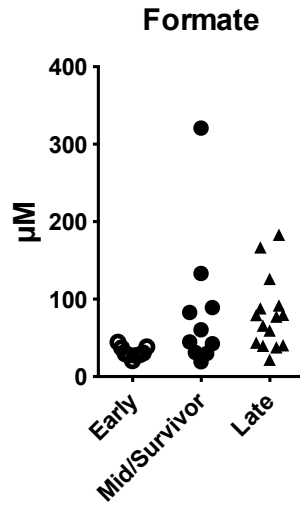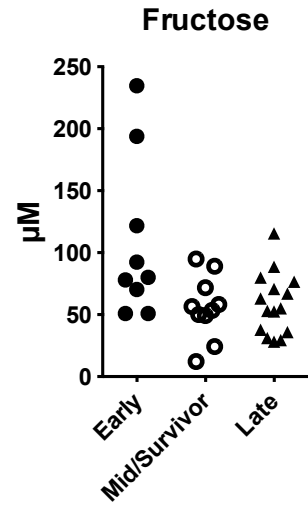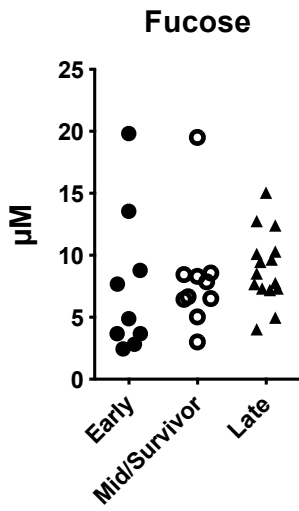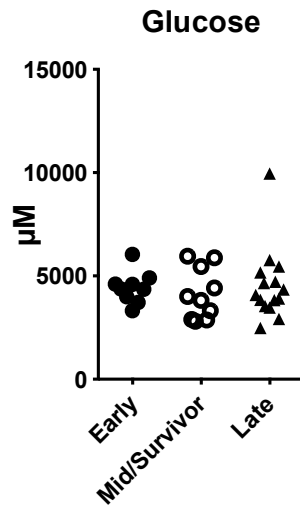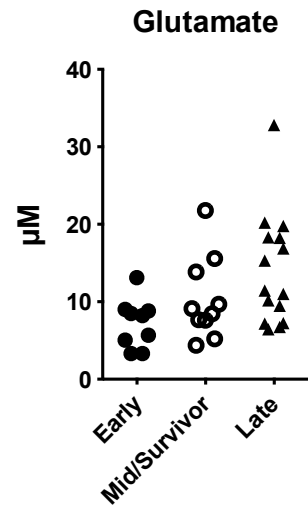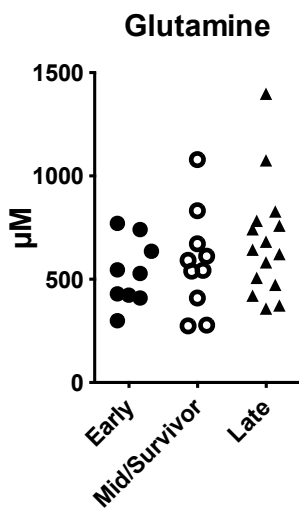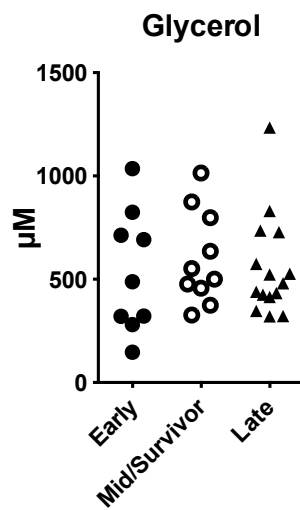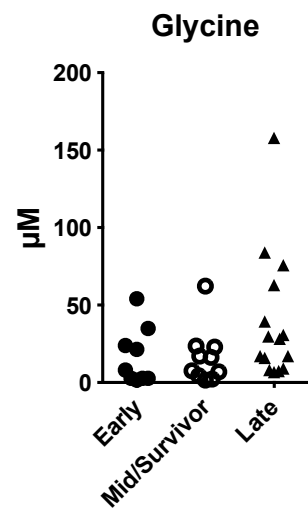

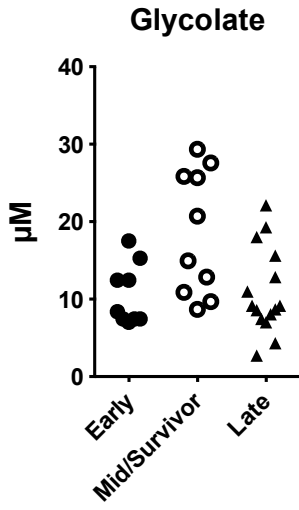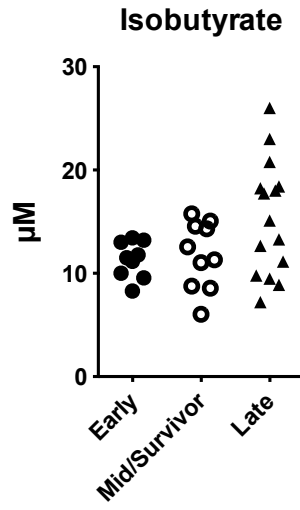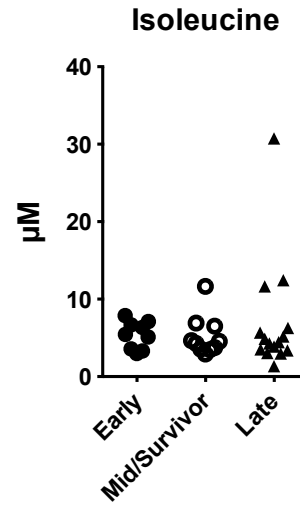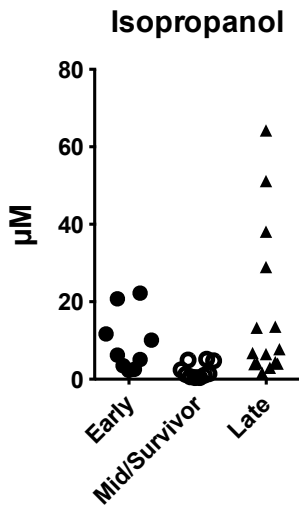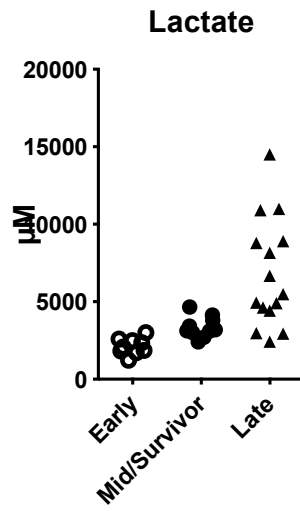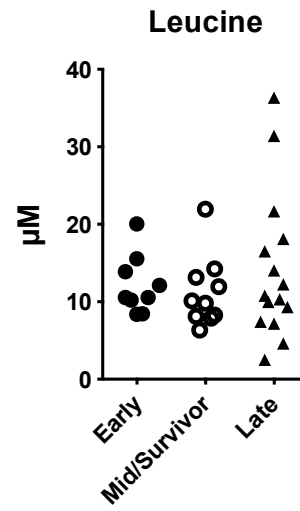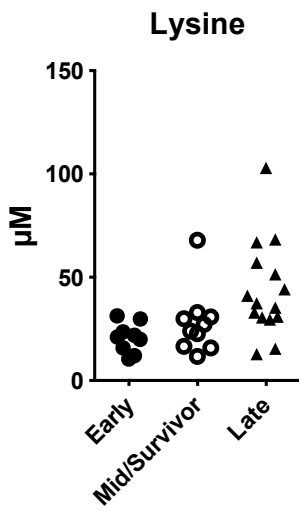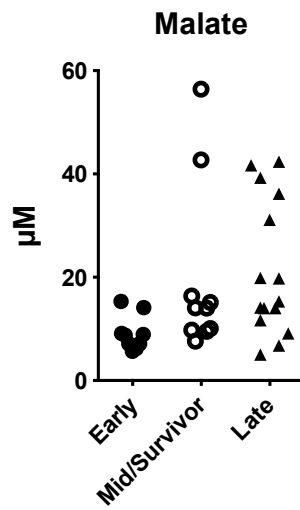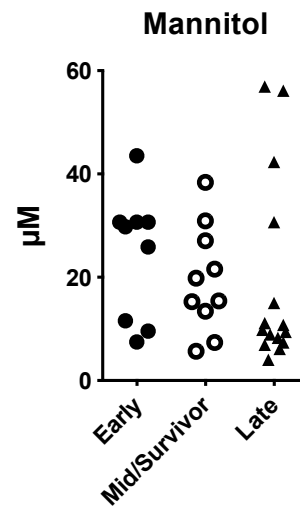

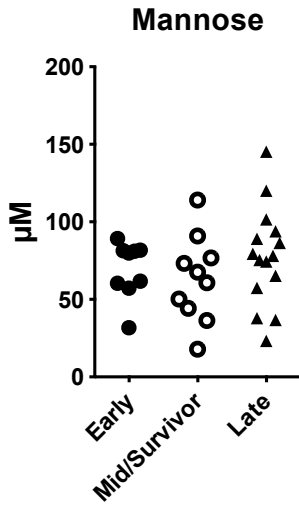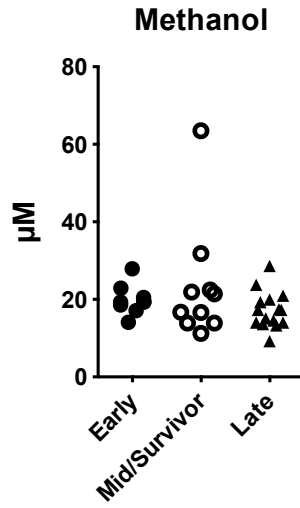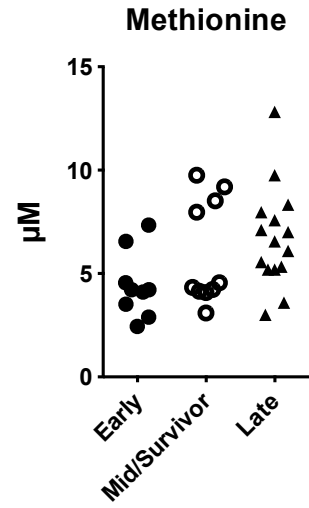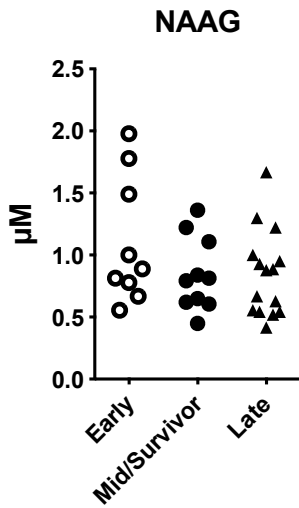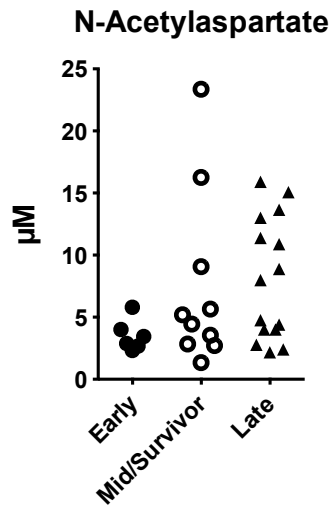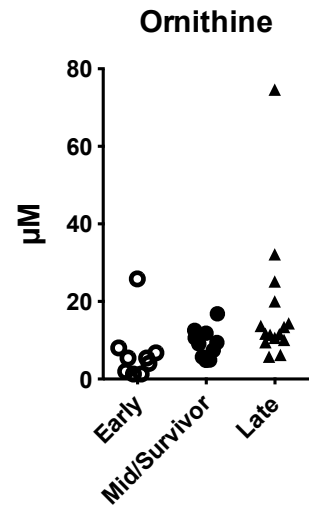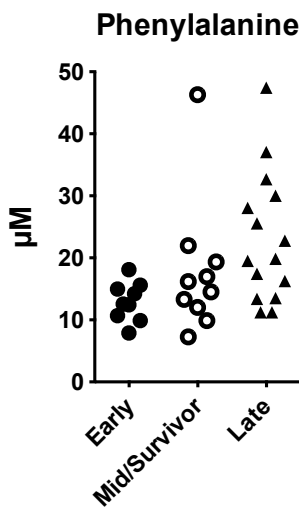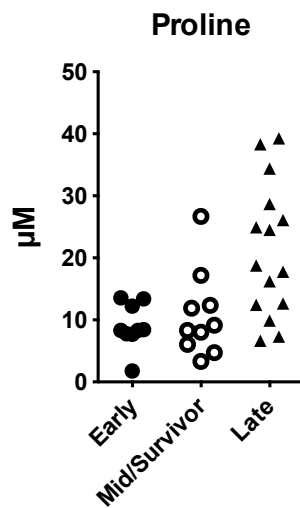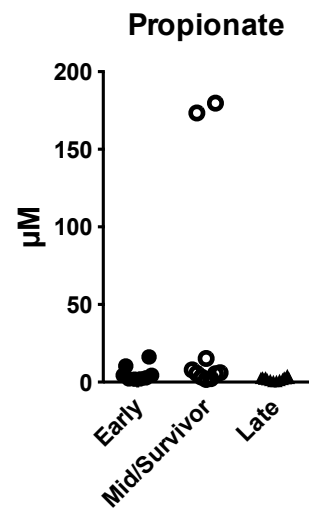

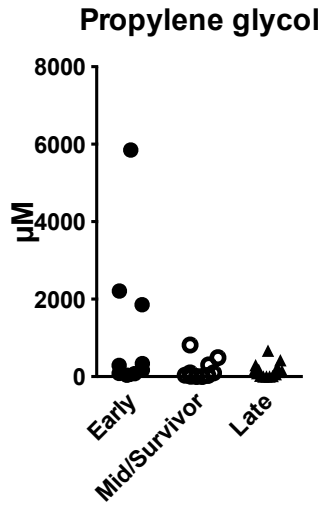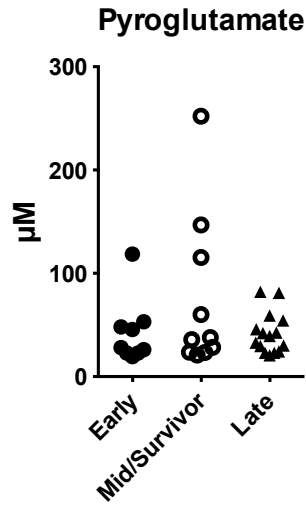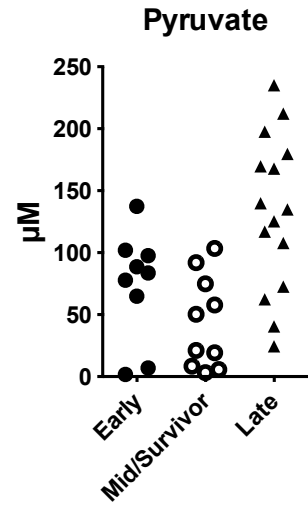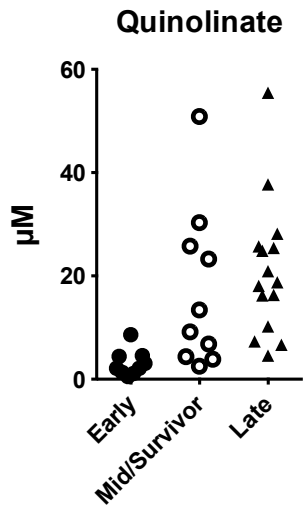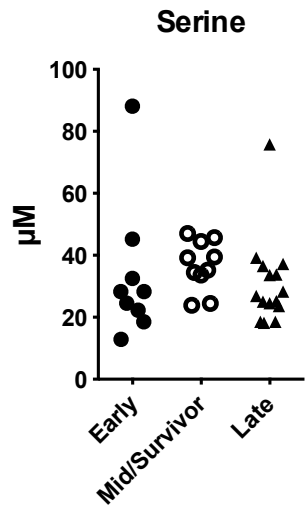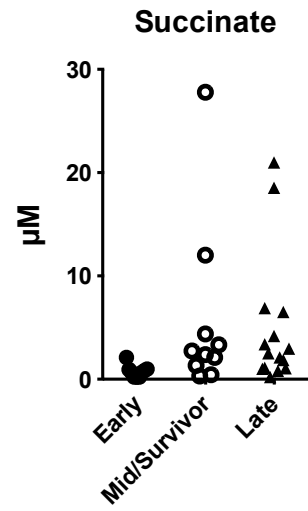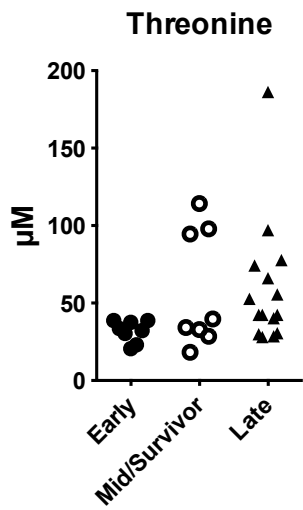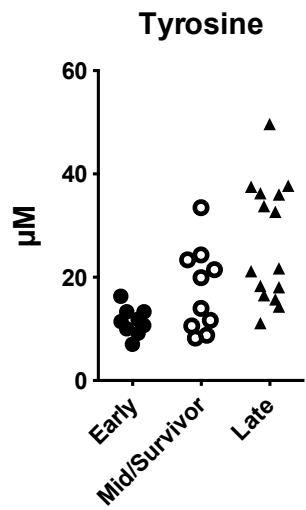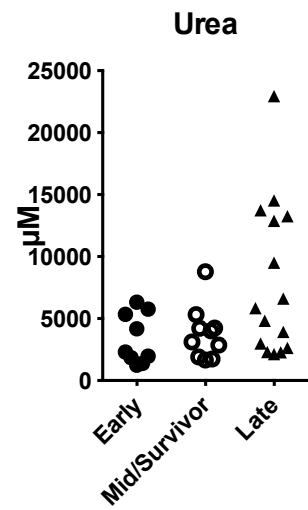

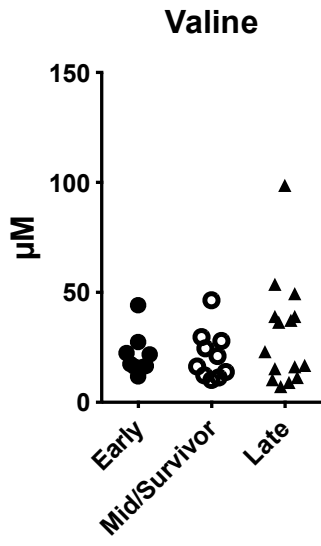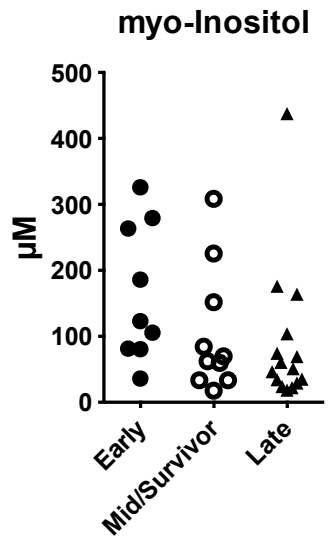

Supplement: NIHMS766983-supplement-supplemental_material.pdf [file NIHMS766983-supplement-supplemental_material.pdf]
